# Supplementary material for: TOCOSH FLOUR (Solanum tuberosum L.): A Toxicological Assessment of Traditional Peruvian Fermented Potatoes
Source: MDPI journal article supplement (doi:10.3390/foods9060719), 2020-06-02
Supplement: s1 [file s1]

## Supplementary material

### TOCOSH FLOUR (*Solanum tuberosum* L.): A toxicological Assessment of traditional Peruvian fermented potatoes

Jonas Roberto Velasco-Chong <sup>1</sup>, Oscar Herrera-Calderón <sup>1,\*</sup>, Juan Pedro Rojas-Armas <sup>2</sup>, Renán Dilton Hañari-Quispe <sup>3</sup>, Linder Figueroa-Salvador <sup>4</sup>, Gilmar Peña-Rojas <sup>5</sup>, Vidalina Andía-Ayme <sup>6</sup>, Ricardo Ángel Yuli-Posadas <sup>7</sup>, Andres F. Yepes-Perez <sup>8</sup> and Cristian Aguilar <sup>9</sup>

<sup>1</sup> Academic Department of Pharmacology, Bromatology and Toxicology, Faculty of Pharmacy and Biochemistry, Universidad Nacional Mayor de San Marcos, Jr Puno 1002, Lima 15001, Peru; jvelasco9490@gmail.com

<sup>2</sup> Department of Dynamic Sciences, Faculty of Medicine, Universidad Nacional Mayor de San Marcos, Av. Miguel Grau 755, Cercado de Lima 15001, Peru; jprojasarmas@yahoo.com

<sup>3</sup> Clinical Pathology Laboratory, Faculty of Veterinary Medicine and Zootechnics, Universidad Nacional del Altiplano, Av Floral 1153, Puno 21001, Peru; rhanari@unap.edu.pe

<sup>4</sup> School of Medicine, Faculty of Health Sciences, Universidad Peruana de Ciencias Aplicadas, Prolongación Primavera 2390, Lima 15023, Peru; pcmelfig@upc.edu.pe

<sup>5</sup> Laboratory of Cellular and Molecular Biology, Biological Sciences Faculty, Universidad Nacional de San Cristóbal de Huamanga, Portal Independencia 57, Ayacucho 05003, Peru; gilmar.pena@unsch.edu.pe

<sup>6</sup> Food Microbiology Laboratory, Biological Sciences Faculty, Universidad Nacional de San Cristóbal de Huamanga, Portal Independencia 57, Ayacucho 05003, Peru; vidalina.andia@unsch.edu.pe

<sup>7</sup> Universidad Continental, Av San Carlos 1980, Huancayo 12000, Peru; ryuli@continental.edu.pe

<sup>8</sup> Chemistry of Colombian Plants, Institute of Chemistry, Faculty of Exact and Natural Sciences, University of Antioquia-UdeA, Calle 70 52-21, A.A 1226, Medellin 050010, Colombia; andresf.yepes@udea.edu.co

<sup>9</sup> Laboratory of Pathology, Instituto Nacional Cardiovascular, Jirón Coronel Zegarra 417, Jesús María 15072, Peru, a.crisaguilar@gmail.com

\* Correspondence: oherreraca@unmsm.edu.pe; Tel.: +51-956-550-510

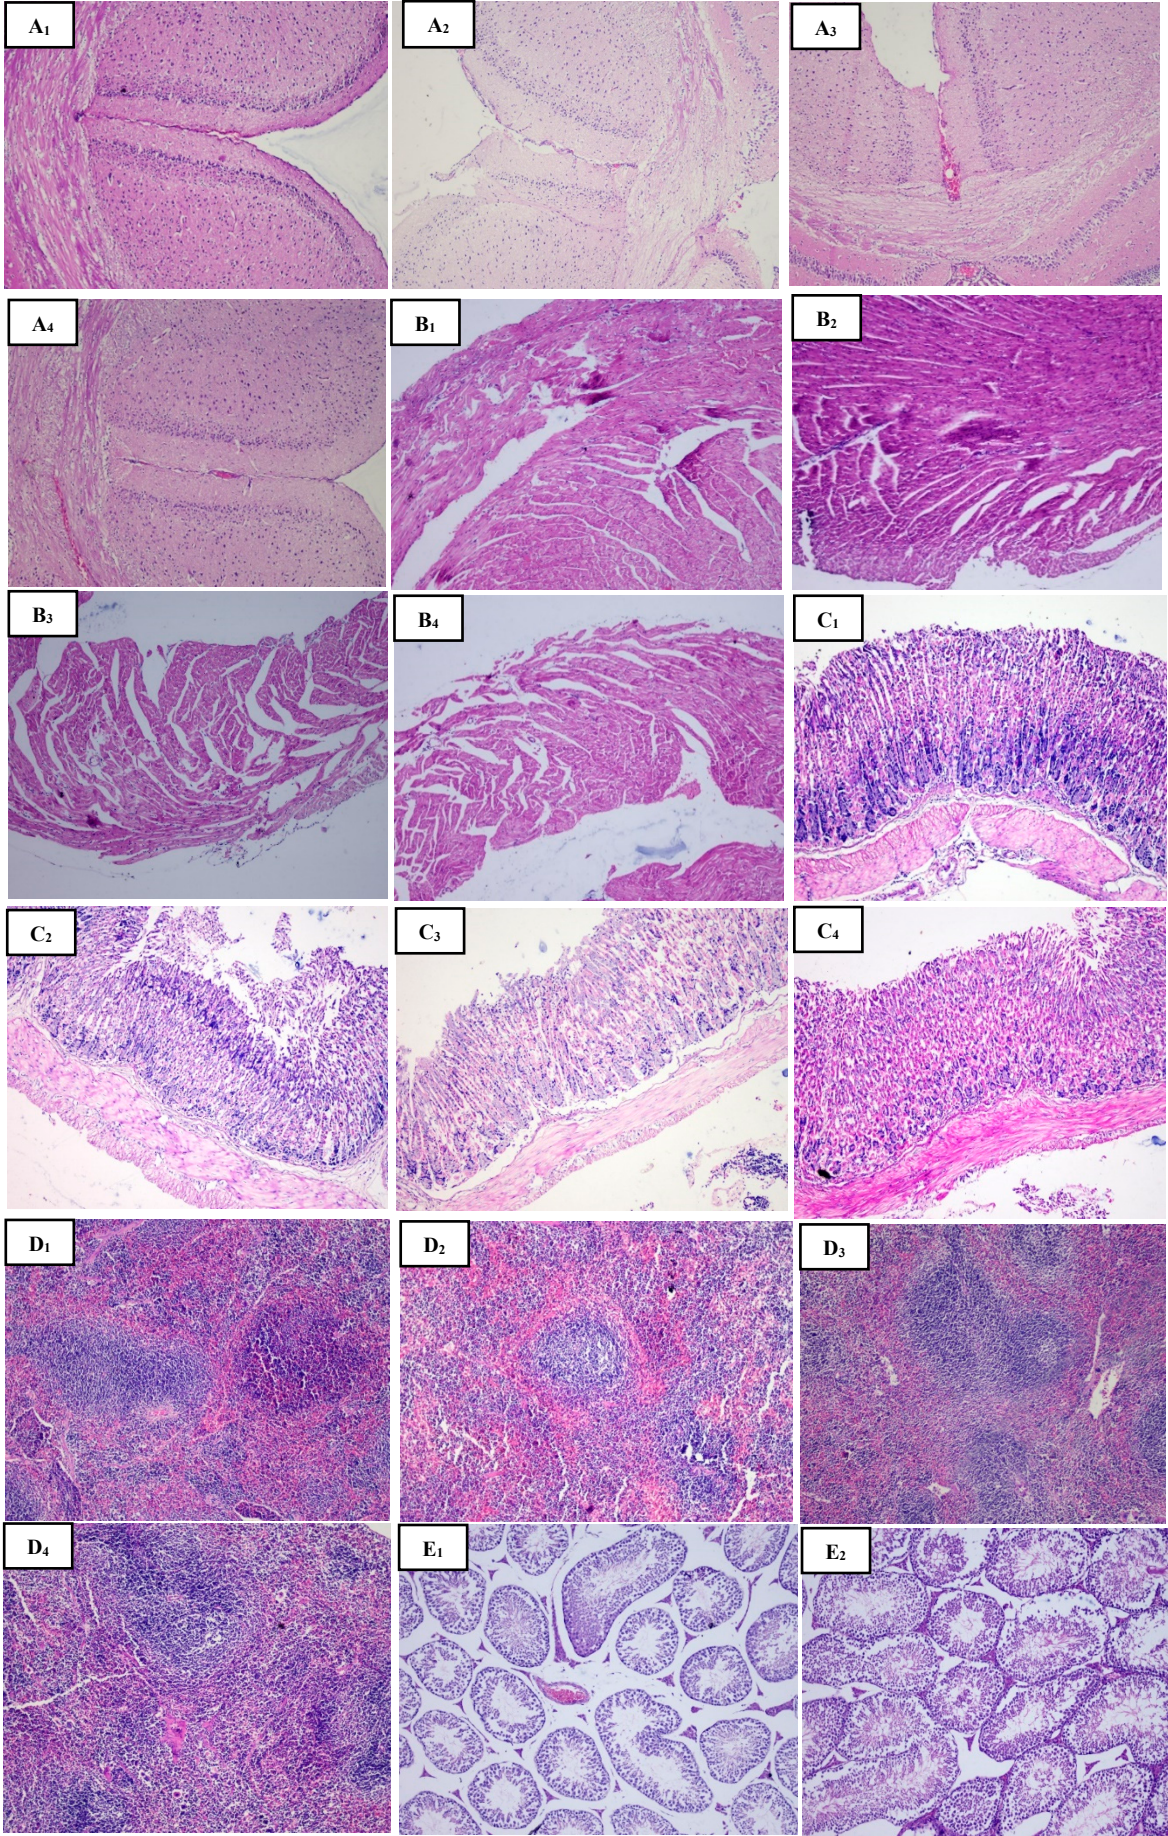

**Figure S1.** Images of some tissues of male and female mice without specific alterations that received fixed doses of 2000 mg/kg and 5000 mg/kg of Tocosh Flour stained with H&E and 40X.

A1. Male mouse at the dose of 2000 mg / kg. Brain - Brain parenchyma without significant alterations.

A2. Female mouse at the dose of 2000 mg / kg. Brain - Brain parenchyma without significant alterations.

A3. Male mouse at the dose of 5000 mg / Kg. Brain - Brain parenchyma without significant alterations.

A4. Female mouse at the dose of 5000 mg / Kg. Brain - Brain parenchyma without significant alterations.

B1 Male mouse at the dose of 2000 mg / Kg. Heart - Myocardium without specific alterations.

B2 Female mouse at the dose of 2000 mg / Kg. Heart - Myocardium without specific alterations.

B3 Male mouse at the dose of 5000 mg / Kg. Heart - Myocardium without specific alterations.

B4 Female mouse at the dose of 5000 mg / Kg. Heart - Myocardium without specific alterations.

C1. Male mouse at the dose of 2000 mg / Kg. stomach - Gastric mucosa without affected alterations.

C2 Female mouse at the dose of 2000 mg / Kg. stomach - Gastric mucosa without affected alterations.

C3 Male mouse at the dose of 5000 mg / Kg. stomach- Gastric mucosa without affected alterations.

C4. Female mouse at the dose of 5000 mg / Kg. stomach - Gastric mucosa without affected alterations.

D1 Male mouse at the dose of 2000 mg / kg. Spleen - splenic parenchyma without specific alterations.

D2 Female mouse at the dose of 2000 mg / Kg. Spleen - splenic parenchyma without specific alterations.

D3 Male mouse at the dose of 5000 mg / Kg. Spleen - Splenic parenchyma without specific alterations.

D4 Female mouse at the dose of 5000 mg / Kg. Spleen - splenic parenchyma without specific alterations.

E1 Male mouse at the dose of 2000 mg / Kg. Testis - Testicular parenchyma without specific alterations.

E2 Male mouse at the dose of 5000 mg / Kg. Testis - Testicular parenchyma without specific alterations

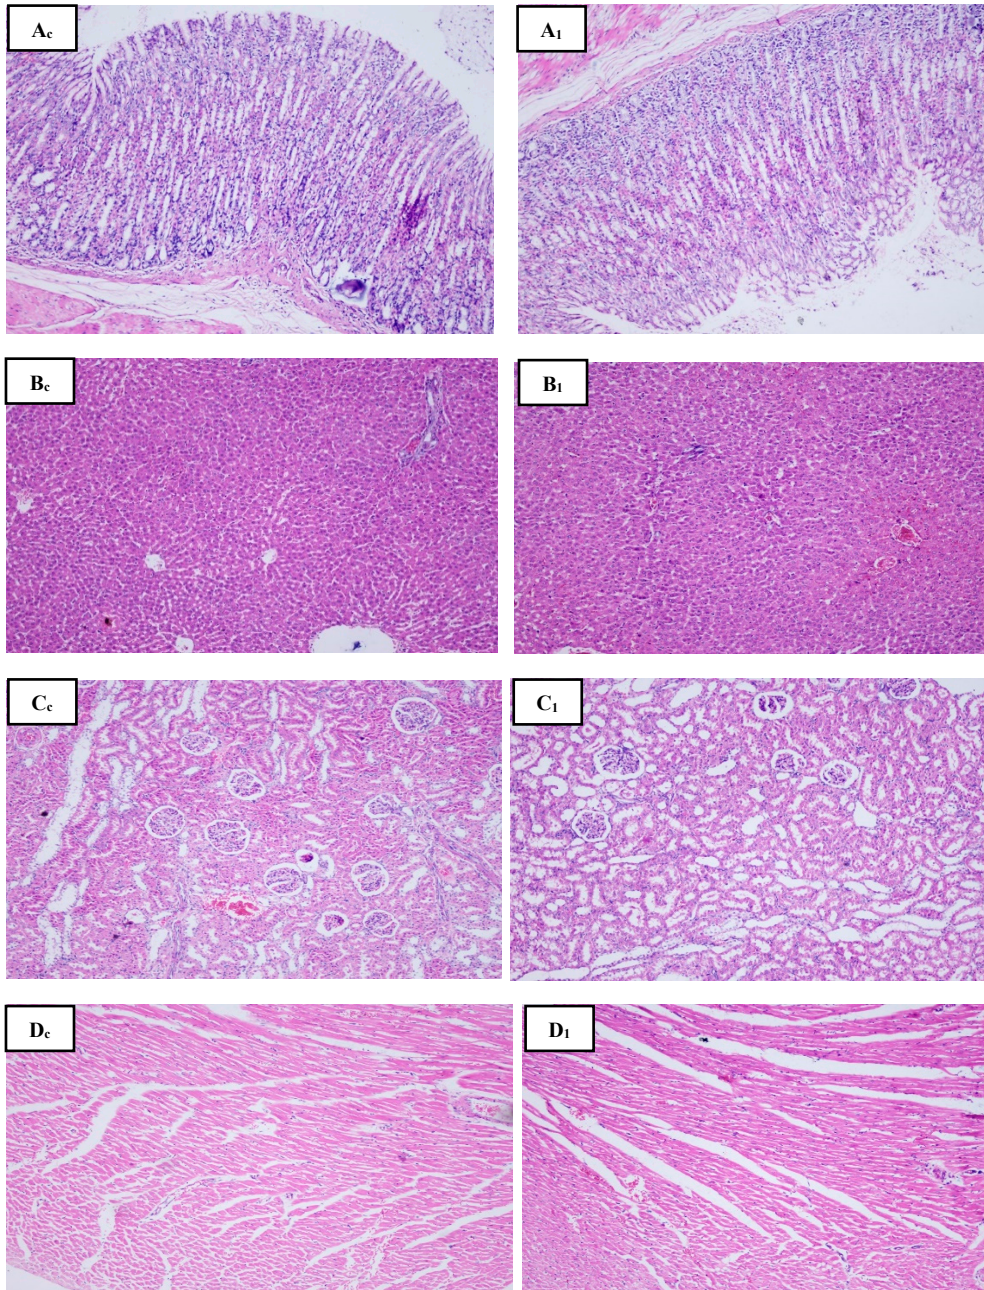

**Figure S2.** Images of the organ sections: Stomach (A), liver (B), Kidney (C) and heart (D), of male rats who were administered Tocosh flour for 28 days. Subscript C and 1 refer to the control group and the group administered at dose of 1000 mg / kg /day, respectively. H&E staining, 40X.

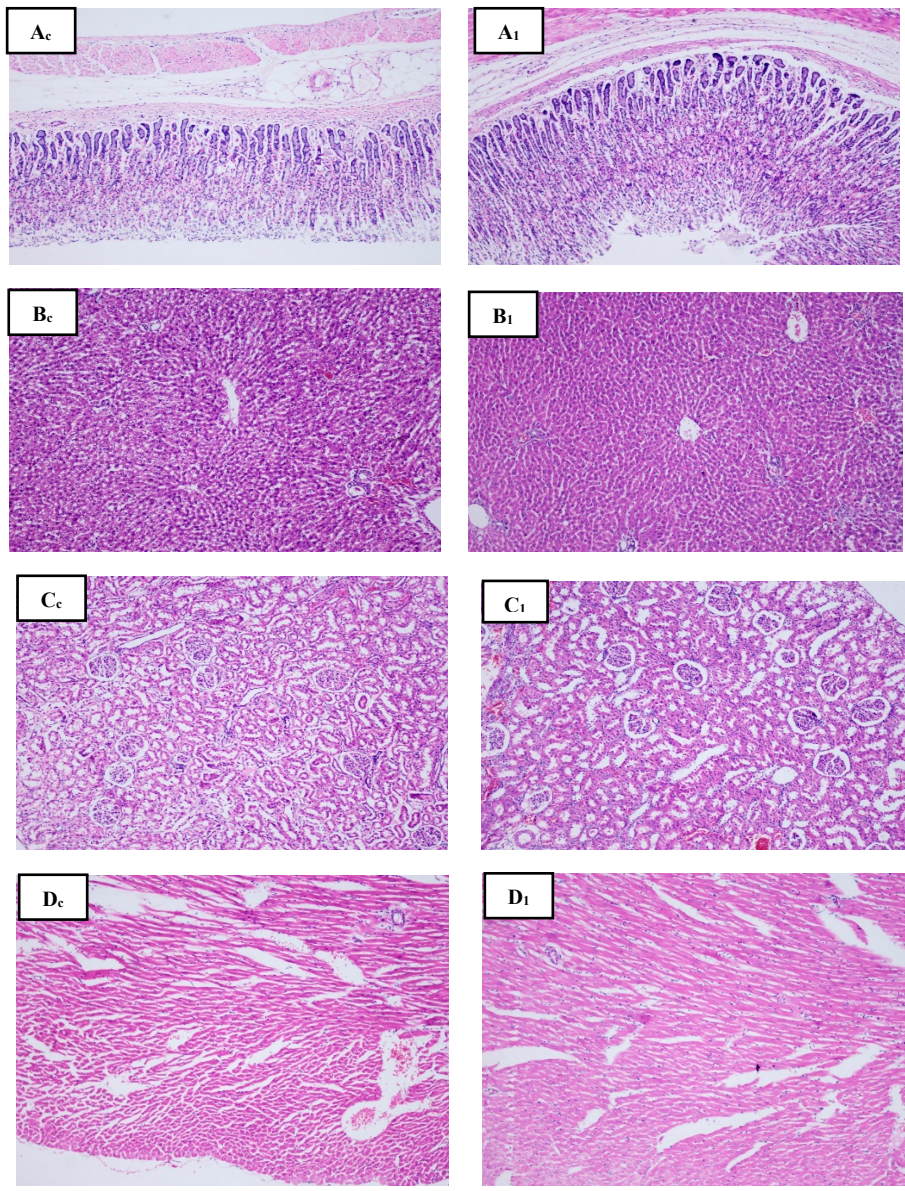

**Figure S3.** Images of the organ sections such as: Stomach (A), liver (B), Kidney (C) and heart (D), of female rats that were administered Tocosh flour for 28 days. Subscript C and 1 refer to the control and group administered at dose of 1000 mg / kg / day, respectively. H&E staining, 40X.
